# Supplementary material
Source: PubMed Central journal article supplement (PMC8274748)
Supplement: tpmd201516.SD1.pdf [file tpmd201516.SD1.pdf]

### Supplemental STORBE Checklist:

|                              |                                                           |
|------------------------------|-----------------------------------------------------------|
|                              |                                                           |
| <b>Title and abstract</b>    | <b>Title:</b> In the top of the manuscript (Line 1 and 2) |
|                              | <b>Abstract:</b> In page 2 (Line 20- 38)                  |
| <b>Introduction</b>          |                                                           |
| Background/<br>rationale     | In Page 3-5. Line 46- 103                                 |
| Objectives                   | In page 5. Line 104-108                                   |
| <b>Methods</b>               |                                                           |
| Study design                 | In page 6-8. Line 113- 158                                |
| Setting                      | Page 6. Line 113-116                                      |
| Participants                 | Page 6. Line 125-127                                      |
| Variables                    | Page 8. Line 171-176                                      |
| Data sources/<br>measurement | Page 6-8. Line 127-159                                    |
| Bias                         | Page 13. Line 251-276                                     |
| Study size                   | Page 6. Line 125-127, Page 9 line 204-205                 |
| Quantitative<br>variables    | Page 8. Line 171-177                                      |
| Statistical methods          | Page 8. Line 169-178                                      |
| <b>Results</b>               |                                                           |
| Participants                 | Page 6 line 113-123; Page 8. Line 183-184                 |
| Descriptive data             | Page 9. Line 183-205                                      |
| Outcome data                 | Page 10. Line 208-209                                     |
| Main results                 | Page 8 line 177-178; Page 9-10. Line 183-214              |
| Other analyses               |                                                           |
|                              |                                                           |
| <b>Discussion</b>            |                                                           |
| Key results                  | Page 10. Line 208-214                                     |
| Limitations                  | Page 12. Line 256-267                                     |
| Interpretation               | Page 10-12. Line 224-254                                  |
| Generalisability             | Page 13 line 275-276                                      |
|                              |                                                           |
| <b>Other information</b>     |                                                           |
| Funding                      | Page 13. Line 286-295                                     |
|                              |                                                           |
